# Supplementary material for: Wood outlasts graphite: revolutionary birch biomass-based carbon anodes for long-life lithium-ion batteries
Source: Royal Society of Chemistry journal article supplement (doi:10.1039/d6ra03501a), 2026-06-04
Supplement: d6ra03501a1.pdf [file d6ra03501a1.pdf]

## Supporting Information

### Wood Outlasts Graphite: Revolutionary Birch-Based Bio-Carbon Anodes for Long-Life Lithium-Ion Batteries

Glaydson Simoes dos Reis<sup>a</sup>, Mukhtiar Ahmed<sup>b</sup>, Luis O.P. Silva<sup>c</sup>, Jyri-Pekka Mikkola<sup>a,b</sup>, Lashari Najeeb ur Rehman<sup>a\*</sup>

<sup>a</sup> *Laboratory of Industrial Chemistry and Reaction Engineering, Faculty of Science and Engineering, Åbo Akademi University, 20500, Åbo/Turku, Finland*

<sup>b</sup> *Wallenberg Wood Science Center, Technical Chemistry, Department of Chemistry, Chemical-Biological Centre, Umeå University, SE-90187, Umeå, Sweden*

<sup>c</sup> *Universidad de La Costa, CUC, Calle 58 # 55–66, Barranquilla, Atlántico, Colombia*

\* Corresponding author

E-mail addresses: [Glaydson.SimoesdosReis@abo.fi](mailto:Glaydson.SimoesdosReis@abo.fi), [najeeb.lashari@abo.fi](mailto:najeeb.lashari@abo.fi)

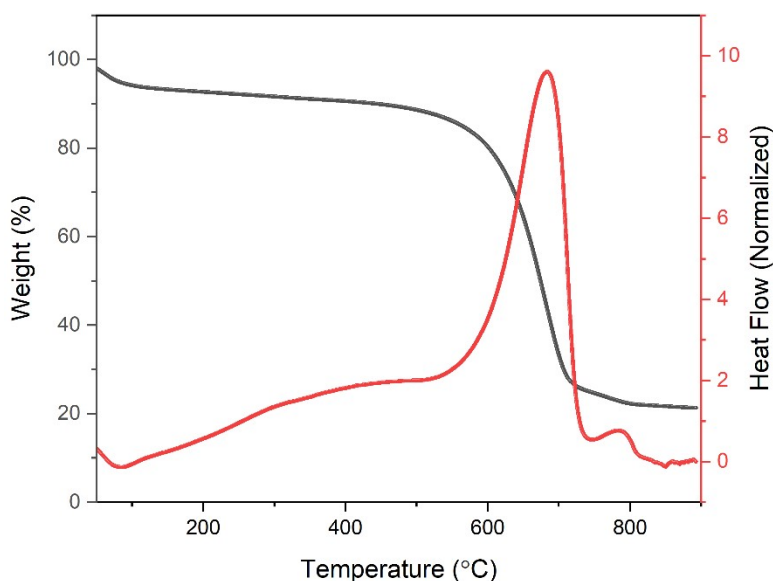

Figure S1 TGA and DTGA of BCAM

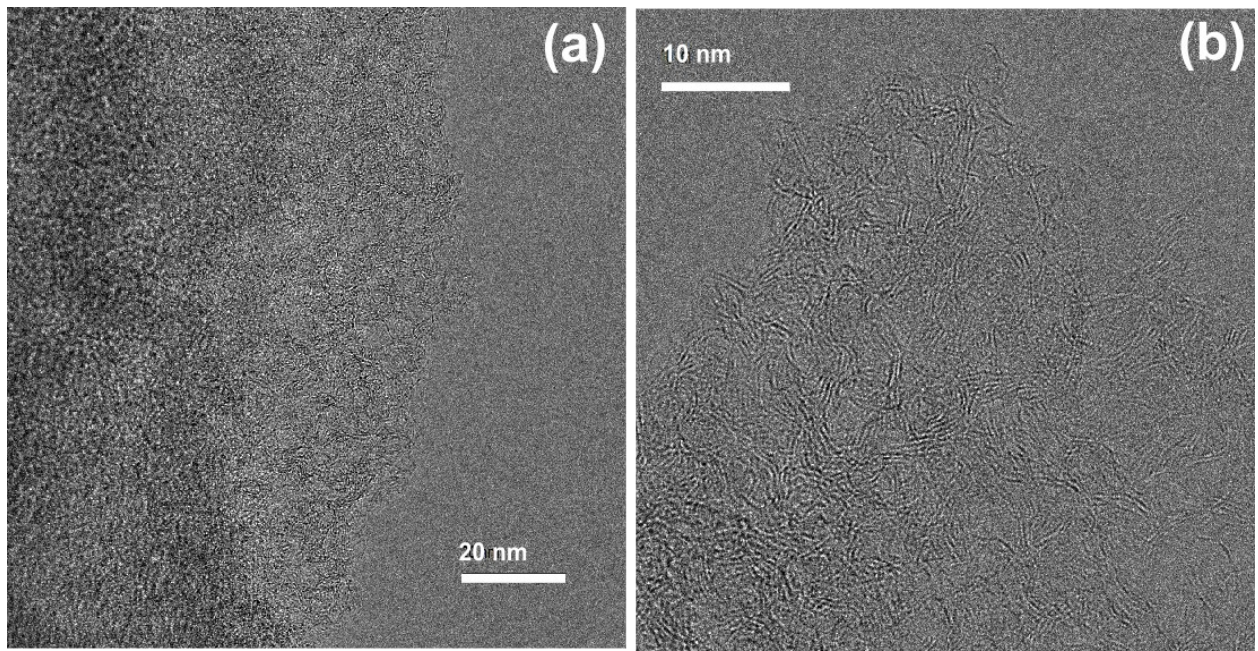

Figure S2 (a) TEM and (b) HRTEM of the BCAM

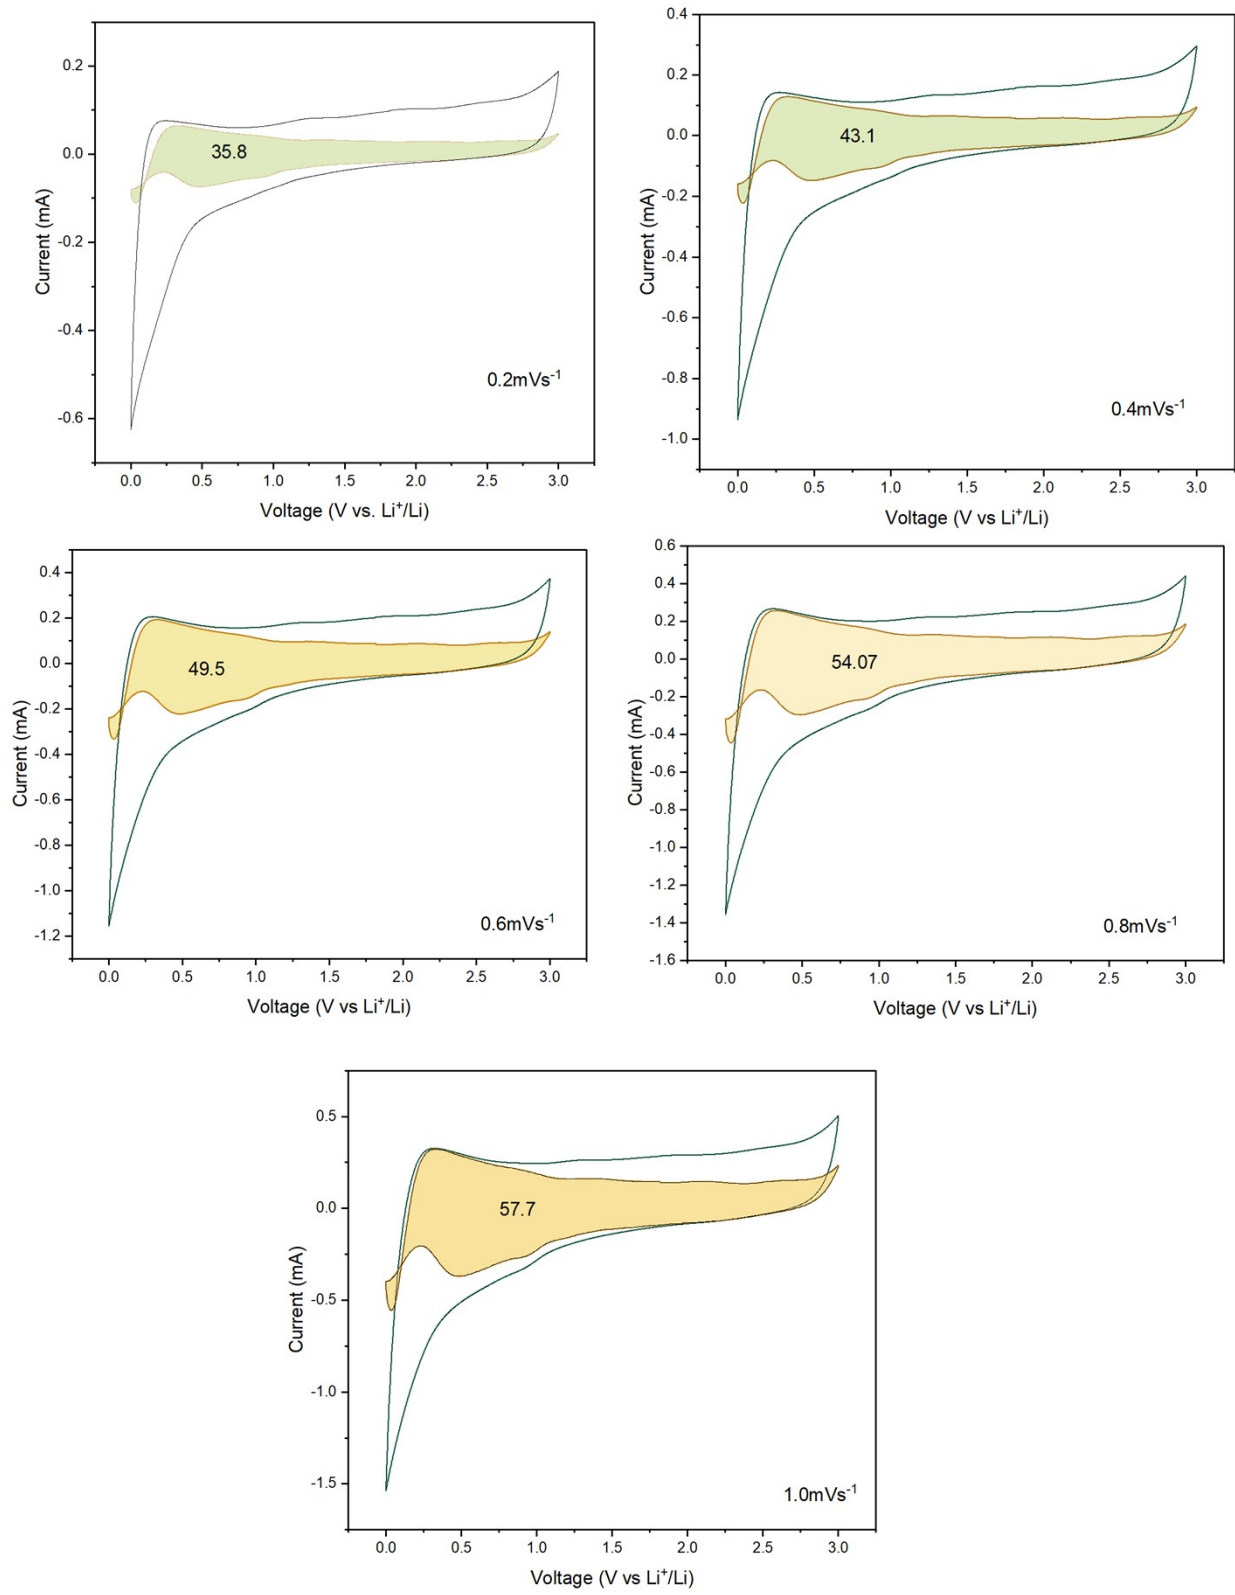

Figure S3 Capacitive and diffusion-controlled capacitance contribution of BCAMs at scan rates of 0.2, 0.4, 0.6, 0.8 and 1 mVs<sup>-1</sup>

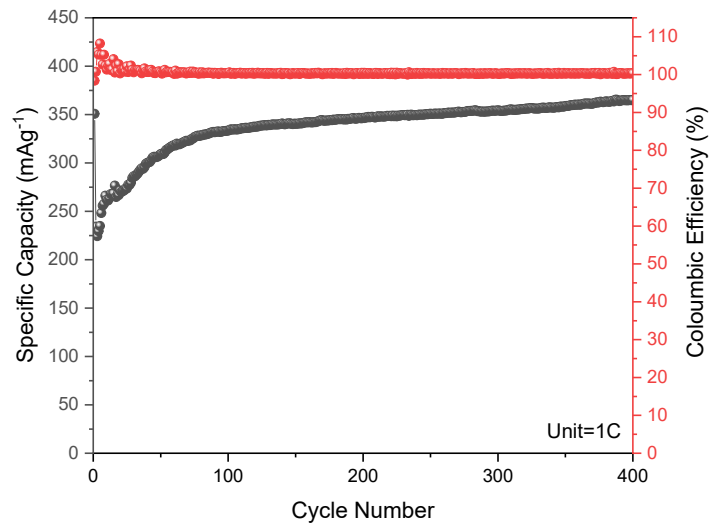

Figure S4. Long cycle performance of graphite at 1C for 400 cycles

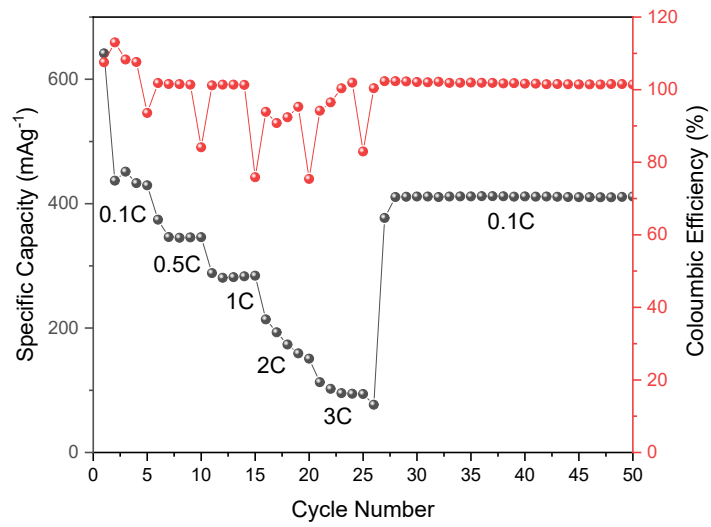

Figure S5 Shows the Rate performance of Graphite

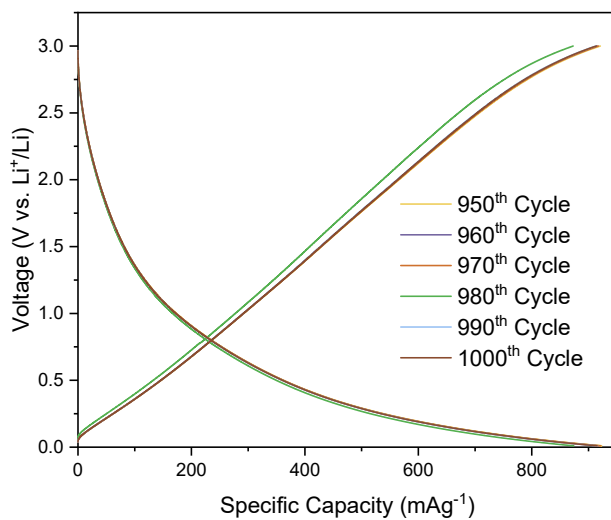

Figure S6 show charge-discharge curves for BCAM electrode at 1C.

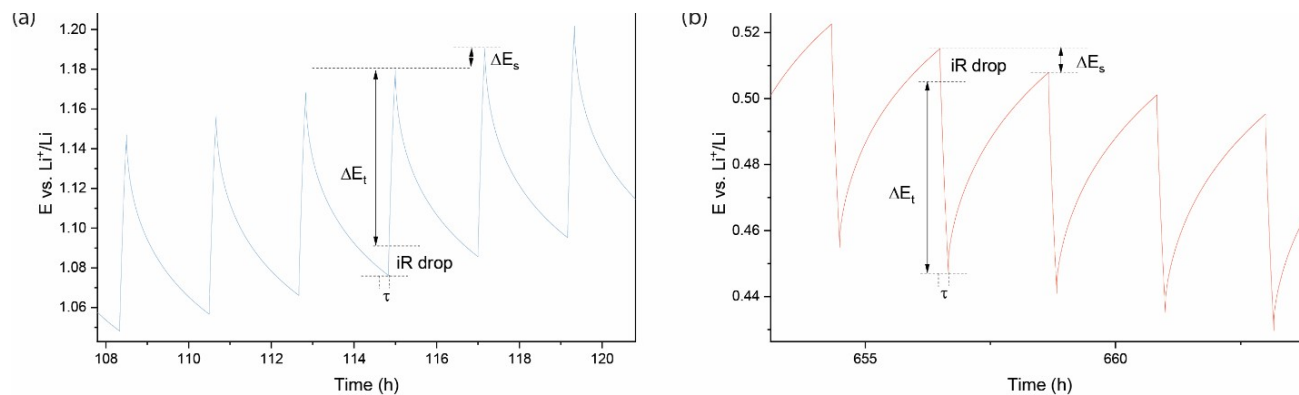

Figure S7. current step during (a)charge and (b)discharge in GITT curve
